# Supplementary material for: Endocytosis as a stabilizing mechanism for tissue homeostasis
Source: PubMed Central journal article supplement — Proc Natl Acad Sci U S A. 2018 Feb 2;115(8):E1926–35. doi: 10.1073/pnas.1714377115 (PMC5828590; doi:10.1073/pnas.1714377115), 2018-02-02
Supplement: pnas.201714377SI.pdf [file pnas.201714377SI.pdf]

# Supporting Information

Adler et al. 10.1073/pnas.1714377115

## SI Methods

**Considering Different Halfway Points for Signaling, Endocytosis, and Cross-Regulation.** We start with the model equations (Eqs. 1, 2, 5, and 6 in the main text) with different halfway points for signaling ( $k_{ij}$ ) endocytosis ( $e_{ij}$ ), and cross-regulation ( $r_{ij}$ ):

$$\dot{X}_1 = X_1 \left( \lambda_1 \frac{C_{21}}{C_{21} + k_{21}} \left( 1 - \frac{X_1}{K} \right) - \mu_1 \right) \quad [\text{S1}]$$

$$\dot{X}_2 = X_2 \left( \lambda_2 \frac{C_{12}}{C_{12} + k_{12}} - \mu_2 \right) \quad [\text{S2}]$$

$$\begin{aligned} \dot{C}_{12} = & \beta_{12} X_1 \left( 1 - \frac{1}{2} \theta (1 + \theta) + \theta \frac{C_{21}}{C_{21} + r_{21}} \right) \\ & + \beta_{22} X_2 - \alpha_{12} X_2 \frac{C_{12}}{C_{12} + e_{12}} - \gamma C_{12} \end{aligned} \quad [\text{S3}]$$

$$\begin{aligned} \dot{C}_{21} = & \beta_{21} X_2 \left( 1 - \frac{1}{2} \omega (1 + \omega) + \omega \frac{C_{12}}{C_{12} + r_{12}} \right) \\ & + \beta_{11} X_1 - \alpha_{21} X_1 \frac{C_{21}}{C_{21} + e_{21}} - \gamma C_{21}. \end{aligned} \quad [\text{S4}]$$

Now, the dimensionless equations with the normalized variables,  $\tilde{C}_{ij} = C_{ij}/k_{ij}$ , depend on four additional parameters:  $\tilde{e}_{ij} = e_{ij}/k_{ij}$ ,  $\tilde{r}_{ij} = r_{ij}/k_{ij}$  (for convenience we do not keep the  $\sim$  sign):

$$\dot{X}_1 = X_1 \left( \lambda_1 \frac{C_{21}}{C_{21} + 1} (1 - X_1) - 1 \right) \quad [\text{S5}]$$

$$\dot{X}_2 = \mu X_2 \left( \lambda_2 \frac{C_{12}}{C_{12} + 1} - 1 \right) \quad [\text{S6}]$$

$$\begin{aligned} 0 = & \beta_{12} X_1 \left( 1 - \frac{1}{2} \theta (1 + \theta) + \theta \frac{C_{21}}{C_{21} + r_{21}} \right) \\ & + \beta_{22} X_2 - \alpha_{12} X_2 \frac{C_{12}}{C_{12} + e_{12}} - C_{12} \end{aligned} \quad [\text{S7}]$$

$$\begin{aligned} 0 = & X_2 \left( 1 - \frac{1}{2} \omega (1 + \omega) + \omega \frac{C_{12}}{C_{12} + r_{12}} \right) \\ & + \beta_{11} X_1 - \alpha_{21} X_1 \frac{C_{21}}{C_{21} + e_{21}} - C_{21}. \end{aligned} \quad [\text{S8}]$$

Solving for the nullclines yields

$$\begin{aligned} X_2 = & \frac{(\lambda_2 - 1)e_{12} + 1}{\alpha_{12} - ((\lambda_2 - 1)e_{12} + 1)\beta_{22}} \\ & \times \left( \frac{1}{1 - \lambda_2} + X_1 \left( 1 - \frac{\theta}{2} (1 + \theta) + \frac{\theta}{1 - r_{21} + r_{21}\lambda_1(1 - X_1)} \right) \right) \end{aligned} \quad [\text{S9}]$$

$$X_2 = \frac{2(1 + r_{12}(\lambda_2 - 1)) \left( X_1 \left( \beta_{11} - \frac{\alpha_{21}}{1 - e_{21} + e_{21}\lambda_1(1 - X_1)} \right) + \frac{1}{1 - \lambda_1(1 - X_1)} \right)}{(-2\omega + (1 + r_{12}(\lambda_2 - 1))(-2 + \omega + \omega^2))}. \quad [\text{S10}]$$

The nullclines described in the main text (Eqs. 24 and 25 in *Methods*) are with  $e_{ij}, r_{ij} = 1$ . Having different values for  $e_{ij}, r_{ij}$  may change

the position of the fixed points but has small effect on the shape of the nullclines and therefore does not affect the stability.

## Proof that Down-Regulation on $C_{12}$ Is Necessary and Sufficient for the Existence of Parameters Under Which the Circuit Has an ON State.

First, we show that the zero fixed point,  $X_1, X_2 = 0$ , is stable for all circuits, meaning that a small deviation away from the OFF state eventually flows back to it. The eigenvalues ( $ev_i$ ) of the system (Eqs. 16–19 in *Methods*) in the OFF state where the cells and GFs are zero are negative for all circuits and all values of parameters:  $ev_1 = ev_2 = ev_3 = -1, ev_4 = -\mu$ . Therefore, the OFF state is always stable and has a certain basin of attraction.

Let us assume that there is no down-regulation on  $C_{12}$ . Therefore,  $X_2$  does not endocytose  $C_{12}$ ,  $\alpha_{12} = 0$ , and the other GF,  $C_{21}$ , does not cross-inhibit  $C_{12}$  gene expression,  $\theta \neq -1$ .

We now show that in the absence of down-regulation on  $C_{12}$  there is no finite ON-state solution. The cells will either flow to the OFF state or grow until  $X_1$  reaches their carrying capacity and  $X_2$  reaches carrying capacity that is not introduced in the model.

We will prove this by analyzing the stability of each fixed point using the following approach: We compute the direction of the flow of the cell numbers ( $\dot{X}_1, \dot{X}_2$ ) on every region on the phase portrait, where each region differs in the sign of the derivatives of the cell numbers. Using these flows, we can determine whether the fixed points are stable or not (see ref. 1, section 6).

We will separate the proof for the case of  $\beta_{22} = 0$  and for the case  $\beta_{22} \neq 0$ .

If  $\beta_{22} = 0$ , without endocytosis the first nullcline (Eq. 24 in *Methods*) is not defined since it is divided by zero. Therefore, we need to go back to the original equation for the first nullcline (Eq. 20 in *Methods*) and substitute there  $\beta_{22}, \alpha_{12} = 0$ :

$$0 = X_1 \left( 1 - \frac{1}{2} \theta (1 + \theta) + \frac{\theta}{\lambda_1(1 - X_1)} \right) - \frac{1}{\lambda_2 - 1}. \quad [\text{S11}]$$

Note that Eq. S11 does not depend on  $X_2$ , and therefore this nullcline is solved independently of  $X_2$ . For  $\theta = 0, 1$  Eq. S11 yields a single solution for  $X_1$ :

$$X_1 = \frac{\theta(\lambda_1 - 1) + 1}{\lambda_1\theta + \lambda_2 - 1}. \quad [\text{S12}]$$

Since there is only a single solution for  $X_1$ , this nullcline can intersect the second nullcline (Eq. 25 in *Methods*) at a single point. This fixed point is unstable, because the zero fixed point is always stable as we showed previously (Fig. S3A).

If  $\beta_{22} \neq 0$ , without endocytosis we can use Eq. 24 (in *Methods*) for the first nullcline, which becomes a decreasing function in  $X_1$ :

$$X_2 = -\frac{1}{\beta_{22}} \left( \frac{1}{1 - \lambda_2} + X_1 \right), \text{ for } \theta = 0 \quad [\text{S13}]$$

$$X_2 = -\frac{1}{\beta_{22}} \left( \frac{1}{1 - \lambda_2} + \frac{1}{\lambda_1} \frac{X_1}{1 - X_1} \right), \text{ for } \theta = 1. \quad [\text{S14}]$$

The second nullcline (Eq. 25 in *Methods*) is a curve that diverges to infinity as  $X_1 \rightarrow (1 - 1/\lambda_1)$ . This curve behaves differently for small  $X_1$  depending on three regimes of the autocrine secretion rate,  $\beta_{11}$ .

If  $\beta_{11} < A$ ,  $A \equiv \lambda_1/(\lambda_1 - 1)^2 + \alpha_{21}/\lambda_1$ , then the second nullcline is a positive monotonic increasing function in  $X_1$ . Recall that the

first nullcline (Eqs. **S13** and **S14**) is a decreasing function of  $X_1$ . Therefore, there is only one possible intersection point between the two nullclines, which is unstable due to the stability of the zero fixed point (Fig. **S3B**).

There exists a value,  $B$ , such that  $A < B$ . If  $A < \beta_{11} < B$ , the second nullcline is a positive hyperbolic function which decreases for  $X_1 < 1$  and increases for larger values of  $X_1$ , diverging as  $X_1 \rightarrow (1 - 1/\lambda_1)$ . In this case, the two nullclines may intersect twice, but we show graphically that the two fixed points are unstable (Fig. **S3C**).

If  $\beta_{11} > B$ , then the second nullcline has the same shape as the previous case only now it becomes negative for a certain intermediate range of  $X_1$  and therefore will intersect the nullcline,  $X_2 = 0$ , twice. Graphically, one can see that the intermediate intersection with  $X_2 = 0$  is unstable and the higher intersection (larger  $X_1$ ) is stable. This leads to the fact that the intersection points between the two curved nullclines are unstable as well (Fig. **S3D**).

To summarize, we showed that in the lack of down-regulation on  $C_{12}$  there is no stable ON state.

We now show that introducing either endocytosis of  $C_{12}$ , namely  $\alpha_{12} > 0$ , or down-regulation by  $C_{21}$  (in the absence of autocrine on  $C_{12}$ ), namely  $\theta = -1$ , is sufficient for a certain range of parameters in which there is a stable ON state.

If  $\alpha_{12} > 0$ , the nullclines (Eqs. **24** and **25** in *Methods*) become

$$X_2 = \frac{\lambda_2}{\alpha_{12} - \lambda_2 \beta_{22}} \left( \frac{1}{1 - \lambda_2} + X_1 \left( 1 - \frac{\theta}{2}(1 + \theta) + \frac{\theta}{\lambda_1(1 - X_1)} \right) \right) \quad [\text{S15}]$$

$$X_2 = \frac{2\lambda_2 \left( X_1 \left( \beta_{11} - \frac{\alpha_{21}}{\lambda_1(1 - X_1)} \right) + \frac{1}{1 - \lambda_1(1 - X_1)} \right)}{(-2\omega + \lambda_2(-2 + \omega + \omega^2))}. \quad [\text{S16}]$$

The first nullcline (Eq. **S15**) is a nonmonotonic function of  $X_1$  that first rises and then declines with  $X_1$  for  $\theta = -1$  (Fig. **S3E**), a linear increasing line for  $\theta = 0$  (Fig. **S3F**), and an increasing curve for  $\theta = 1$  (Fig. **S3G**). For all values of  $\theta, \omega$  there is a range of parameters in which the two nullclines intersect twice, and therefore there is a stable ON state (Fig. **S3E–G**). This can be seen by considering the points where the nullclines cross the  $X_2$  axis, meaning substituting  $X_1 = 0$  in Eqs. **S15** and **S16**. There is a range of parameters (e.g., large  $\alpha_{12}$ ) in which the point on the  $X_2$  axis of the second nullcline (Eq. **S16**) is larger than the point on the  $X_2$  axis of the first nullcline (Eq. **S15**). There is also a range of parameters (large  $\beta_{11}$ ) in which the second nullcline (Eq. **S16**) becomes negative for an intermediate range of  $X_1$ , and then it rises and diverges at  $X_1 \rightarrow (1 - 1/\lambda_1)$ . Therefore, the nullclines must intersect twice for this range of parameters.

If  $\alpha_{12} = 0, \theta = -1$ , the first nullcline (Eq. **S15**) becomes (for  $\beta_{22} \neq 0$ )

$$X_2 = \frac{1}{\beta_{22}} \left( \frac{1}{\lambda_2 - 1} - X_1 \left( 1 - \frac{1}{\lambda_1(1 - X_1)} \right) \right). \quad [\text{S17}]$$

This curve (Eq. **S17**) is a nonmonotonic function of  $X_1$  that first declines and then increases with  $X_1$ . Therefore, for some range of parameters it will cross the other nullcline (Eq. **S16**), which is an increasing function of  $X_1$ , three times. These intersection points are unstable (Fig. **S3H**). Therefore, in the case of no endocytosis, having autocrine on  $C_{12}$  breaks the stability.

If there is no autocrine secretion of  $C_{12}$ , namely  $\beta_{22} = 0$ , the equation for the first nullcline (Eq. **S15**) becomes

$$0 = X_1 \left( 1 - \frac{1}{\lambda_1(1 - X_1)} \right) - \frac{1}{\lambda_2 - 1}. \quad [\text{S18}]$$

This equation is independent of  $X_2$  and has two solutions for  $X_1$ :

$$X_1 = \frac{\lambda_1 + (\lambda_1 - 1)(\lambda_2 - 1) \mp \sqrt{(\lambda_1 + (\lambda_1 - 1)(\lambda_2 - 1))^2 + 4\lambda_1(\lambda_1 - \lambda_1\lambda_2)}}{2\lambda_1(\lambda_2 - 1)}. \quad [\text{S19}]$$

The two solutions for  $X_1$  (Eq. **S19**) are both positive for  $2\sqrt{\lambda_1^3/(-1 + \lambda_1)^4(-1 + \lambda_2)^2 + \lambda_1 + \lambda_1^2/(-1 + \lambda_1)^2(-1 + \lambda_2)} \leq 1$ . Therefore, for a certain range of parameters we have two intersection points between the two nullclines—the first is unstable and the second is the stable ON state (Fig. **S3I**).

To summarize, down-regulation on  $C_{12}$  by  $C_{21}$  (in the absence of autocrine on  $C_{12}$ ) or endocytosis of  $C_{12}$  is sufficient for a stable ON state for a certain range of parameters.

**Two-Cell Circuits Where Both Cells Are Far from Carrying Capacity Cannot Reach Stable ON State.** We model two-cell circuits similar to the model presented in the main text (Eqs. **16–19** in *Methods*) only without the carrying capacity term for  $X_1$ :

$$\dot{X}_1 = X_1(\lambda_1 h(C_{21}) - 1) \quad [\text{S20}]$$

$$\dot{X}_2 = X_2 \mu (\lambda_2 h(C_{12}) - 1) \quad [\text{S21}]$$

$$0 = \beta_{12} X_1 \left( 1 - \frac{1}{2} \theta (1 + \theta) + \theta h(C_{21}) \right) + \beta_{22} X_2 - \alpha_{12} X_2 h(C_{12}) - C_{12} \quad [\text{S22}]$$

$$0 = X_2 \left( 1 - \frac{1}{2} \omega (1 + \omega) + \omega h(C_{12}) \right) + \beta_{11} X_1 - \alpha_{21} X_1 h(C_{21}) - C_{21}. \quad [\text{S23}]$$

The nullclines for these circuits are now

$$X_2 = \frac{\lambda_2}{\alpha_{12} - \lambda_2 \beta_{22}} \left( \frac{1}{1 - \lambda_2} + X_1 \left( 1 - \frac{\theta}{2}(1 + \theta) + \frac{\theta}{\lambda_1} \right) \beta_{12} \right) \quad [\text{S24}]$$

$$X_2 = \frac{2\lambda_2(X_1(\alpha_{21} - \lambda_1\beta_{11})(1 - \lambda_1) - \lambda_1)}{\lambda_1(-2\omega + \lambda_2(-2 + \omega + \omega^2))(\lambda_1 - 1)}. \quad [\text{S25}]$$

These nullclines are simply the nullclines of the original model (Eqs. **24** and **25** in *Methods*), when taking the limit of  $X_1$  cells that are far below their carrying capacity,  $X_1 \ll 1$ .

Both nullclines (Eqs. **24** and **25**) are linear in  $X_1$  and therefore can intersect only once (except for the points where  $X_1 = 0$  or  $X_2 = 0$ ). There are five different cases for the way these two lines cross: one of them decreases and the other one increases, or vice versa, both are increasing, and both are decreasing where one line intersect the  $x_2$  axis higher than the other, and vice versa. In all five cases the intersection point is not stable, as can be seen in the phase portraits (Fig. **S3J–N**).

**Explicit Modeling of Receptor Internalization.** Receptors, such as the CSF1 receptor and the PDGF receptor, are usually internalized and degraded together with their ligand. To model this, we introduce an equation for the receptors  $R_i$ , made by  $X_i$  cells and where removal is due to internalization due to binding of the GF,  $C_{ji}$ , and to receptor degradation-dilution at rate  $\alpha_{Ri}$  [degradation rate is typically on order of  $1/h$  (2–4), exceeding the effects of dilution by cell growth]:

$$\frac{dR_i}{dt} = \beta_{Ri} - \alpha_{ji} h(C_{ji}) R_i - \alpha_{Ri} R_i. \quad [\text{S26}]$$

The equation for the ligand  $C_{ij}$  is a balance of production at rate  $\beta_{ji}$  from cells  $X_j$  and the same internalization rate (due to the stoichiometry in which ligand and receptor are internalized together):

$$\frac{dC_{ij}}{dt} = \beta_{ji} X_j f\left(\frac{R_i}{R_{i,T}}, h(C_{ij}), \theta\right) - \alpha_{ji} h(C_{ij}) R_i X_i - \gamma C_{ij}, \quad [\text{S27}]$$

where  $f(R_i/R_{i,T}, h(C_{ij}), \theta) = \{R_i/R_{i,T}(1-h(C_{ij})), 1, R_i/R_{i,T}h(C_{ij})\}$  for  $\theta = \{-1, 0, 1\}$  respectively describes the cross-regulation due to the other GF  $C_{ij}$  signaling which depends on the fraction of free receptors on the cell surface,  $R_i/R_{i,T}$ , where  $R_{i,T} \equiv \beta_{R_i}/\alpha_{R_i}$  is the amount of receptors per cell when there is no endocytosis,  $\alpha_{ji} = 0$ .

The equation for the cell  $X_i$  is a balance of proliferation and removal as before where the proliferation term is multiplied by the signaling factor,  $R_i/R_{i,T}h(C_{ij})$ :

$$\frac{dX_i}{dt} = X_i \left( \lambda_i \frac{R_i}{R_{i,T}} h(C_{ij}) \left( 1 - \frac{X_i}{K_i} \right) - \mu_i \right). \quad [\text{S28}]$$

Using the fact that receptor and GF removal rates are faster than cell removal rates, we can consider the steady state of the receptor,  $R_{i,ss}$ , in the signaling factor and in the internalization term:  $R_{i,ss}h(C_{ij}) = \beta_{R_i}/(\alpha_{ji}(C_{ij}/k_{ji} + C_{ij}) + \alpha_{R_i})C_{ij}/(k_{ji} + C_{ij}) = \beta_{R_i}/(\alpha_{R_i} + \alpha_{ji})C_{ij}/(\alpha_{R_i}/(\alpha_{R_i} + \alpha_{ji})k_{ji} + C_{ij})$ .

Thus, we get a Michaelis–Menten function of the GF with a new halfway point,  $\tilde{k}_{ji} = \alpha_{R_i}/(\alpha_{R_i} + \alpha_{ji})k_{ji}$ , and a prefactor,  $\beta_{R_i}/(\alpha_{R_i} + \alpha_{ji})$ , that can be collapsed into the model rate parameters.

To simulate this, we consider the dimensionless equations where the dimensionless variables for the GFs and cells are as described in *Methods* and the receptors  $\tilde{R}_i = R_i/(\beta_{R_i}/\alpha_{R_i})$  (for convenience we do not keep the  $\sim$  sign):

1. Strogatz SH (2014) *Nonlinear Dynamics and Chaos: With Applications to Physics, Biology, Chemistry, and Engineering* (Westview, Boulder, CO).
2. Lee PSW, et al. (1999) The Cbl protooncprotein stimulates CSF-1 receptor multi-ubiquitination and endocytosis, and attenuates macrophage proliferation. *EMBO J* 18: 3616–3628.

$$\frac{\mu_1}{\alpha_{R1}} \frac{dR_1}{dt} = 1 - \frac{\alpha_{21}}{\alpha_{R1}} h(C_{21}) R_1 - R_1 \quad [\text{S29}]$$

$$\frac{\mu_1}{\alpha_{R2}} \frac{dR_2}{dt} = 1 - \frac{\alpha_{12}}{\alpha_{R2}} h(C_{12}) R_2 - R_2 \quad [\text{S30}]$$

$$\frac{\mu_1}{\gamma} \frac{dC_{12}}{dt} = \tilde{\beta}_{12} X_1 f(R_1, h(C_{21}), \theta) - \tilde{\alpha}_{12} h(C_{12}) R_2 X_2 - C_{12} \quad [\text{S31}]$$

$$\frac{\mu_1}{\gamma} \frac{dC_{21}}{dt} = X_2 f(R_1, h(C_{12}), \omega) - \tilde{\alpha}_{21} h(C_{21}) R_1 X_1 - C_{21} \quad [\text{S32}]$$

$$\frac{dX_1}{dt} = X_1 \left( \tilde{\lambda}_1 R_1 h(C_{21}) (1 - X_1) - \tilde{\mu}_1 \right) \quad [\text{S33}]$$

$$\frac{dX_2}{dt} = \tilde{\mu} X_2 \left( \tilde{\lambda}_2 R_2 h(C_{12}) - \tilde{\mu}_2 \right). \quad [\text{S34}]$$

We use the fact that the timescale of cells is much slower than the timescale of receptors and GFs to set Eqs. S29–S32 to zero. Therefore, there are two more dimensionless parameters when we consider receptor internalization:  $\alpha_1 = \alpha_{21}/\alpha_{R1}$  and  $\alpha_2 = \alpha_{12}/\alpha_{R2}$ . In Fig. S5B we plot the phase portrait of this system (Eqs. S29–S34) for the same dimensionless parameters as in Fig. 1E only with slightly adjusted proliferation to removal rate ratios,  $\tilde{\lambda}_i$ , which are still within the biological plausible range, and for equal GF internalization and receptor removal rates ( $\alpha_i = 1$ ), which results in very similar phase portrait as in Fig. 1E (Fig. S5B).

3. Yu W, et al. (2012) Macrophage proliferation is regulated through CSF-1 receptor tyrosines 544, 559, and 807. *J Biol Chem* 287:13694–13704.
4. Krupp MN, Connolly DT, Lane MD (1982) Synthesis, turnover, and down-regulation of epidermal growth factor receptors in human A431 epidermoid carcinoma cells and skin fibroblasts. *J Biol Chem* 257:11489–11496.

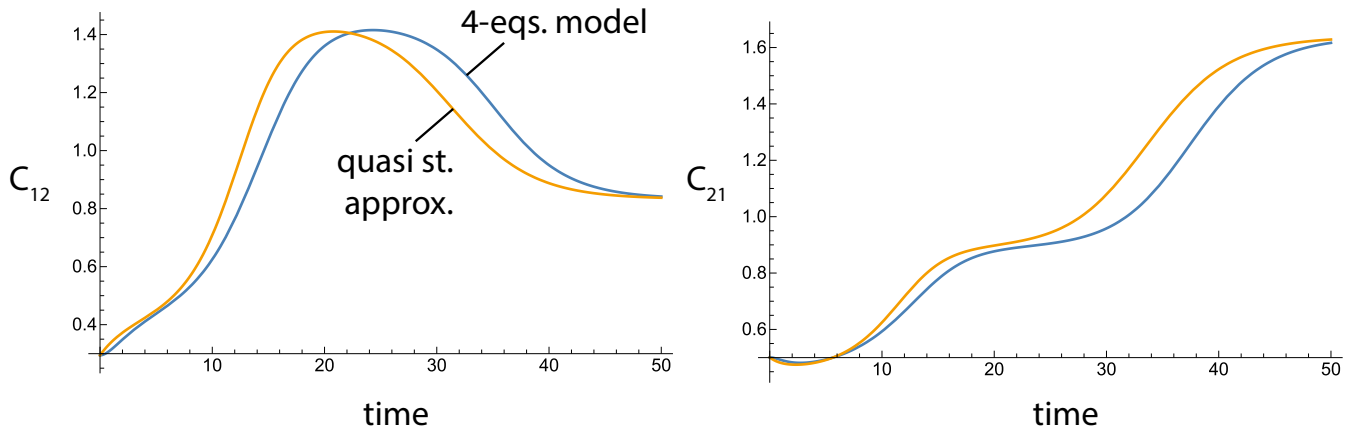

Fig. S1. Dynamics of the GF concentration calculated by solving numerically the four-equation model (Eqs. 1–4 in *Results* section, in blue) and by solving the equations for the cells (Eqs. 1 and 2 in *Results*) while considering a quasi-steady state for the GFs (setting Eqs. 3 and 4 in *Results* to zero, in orange).

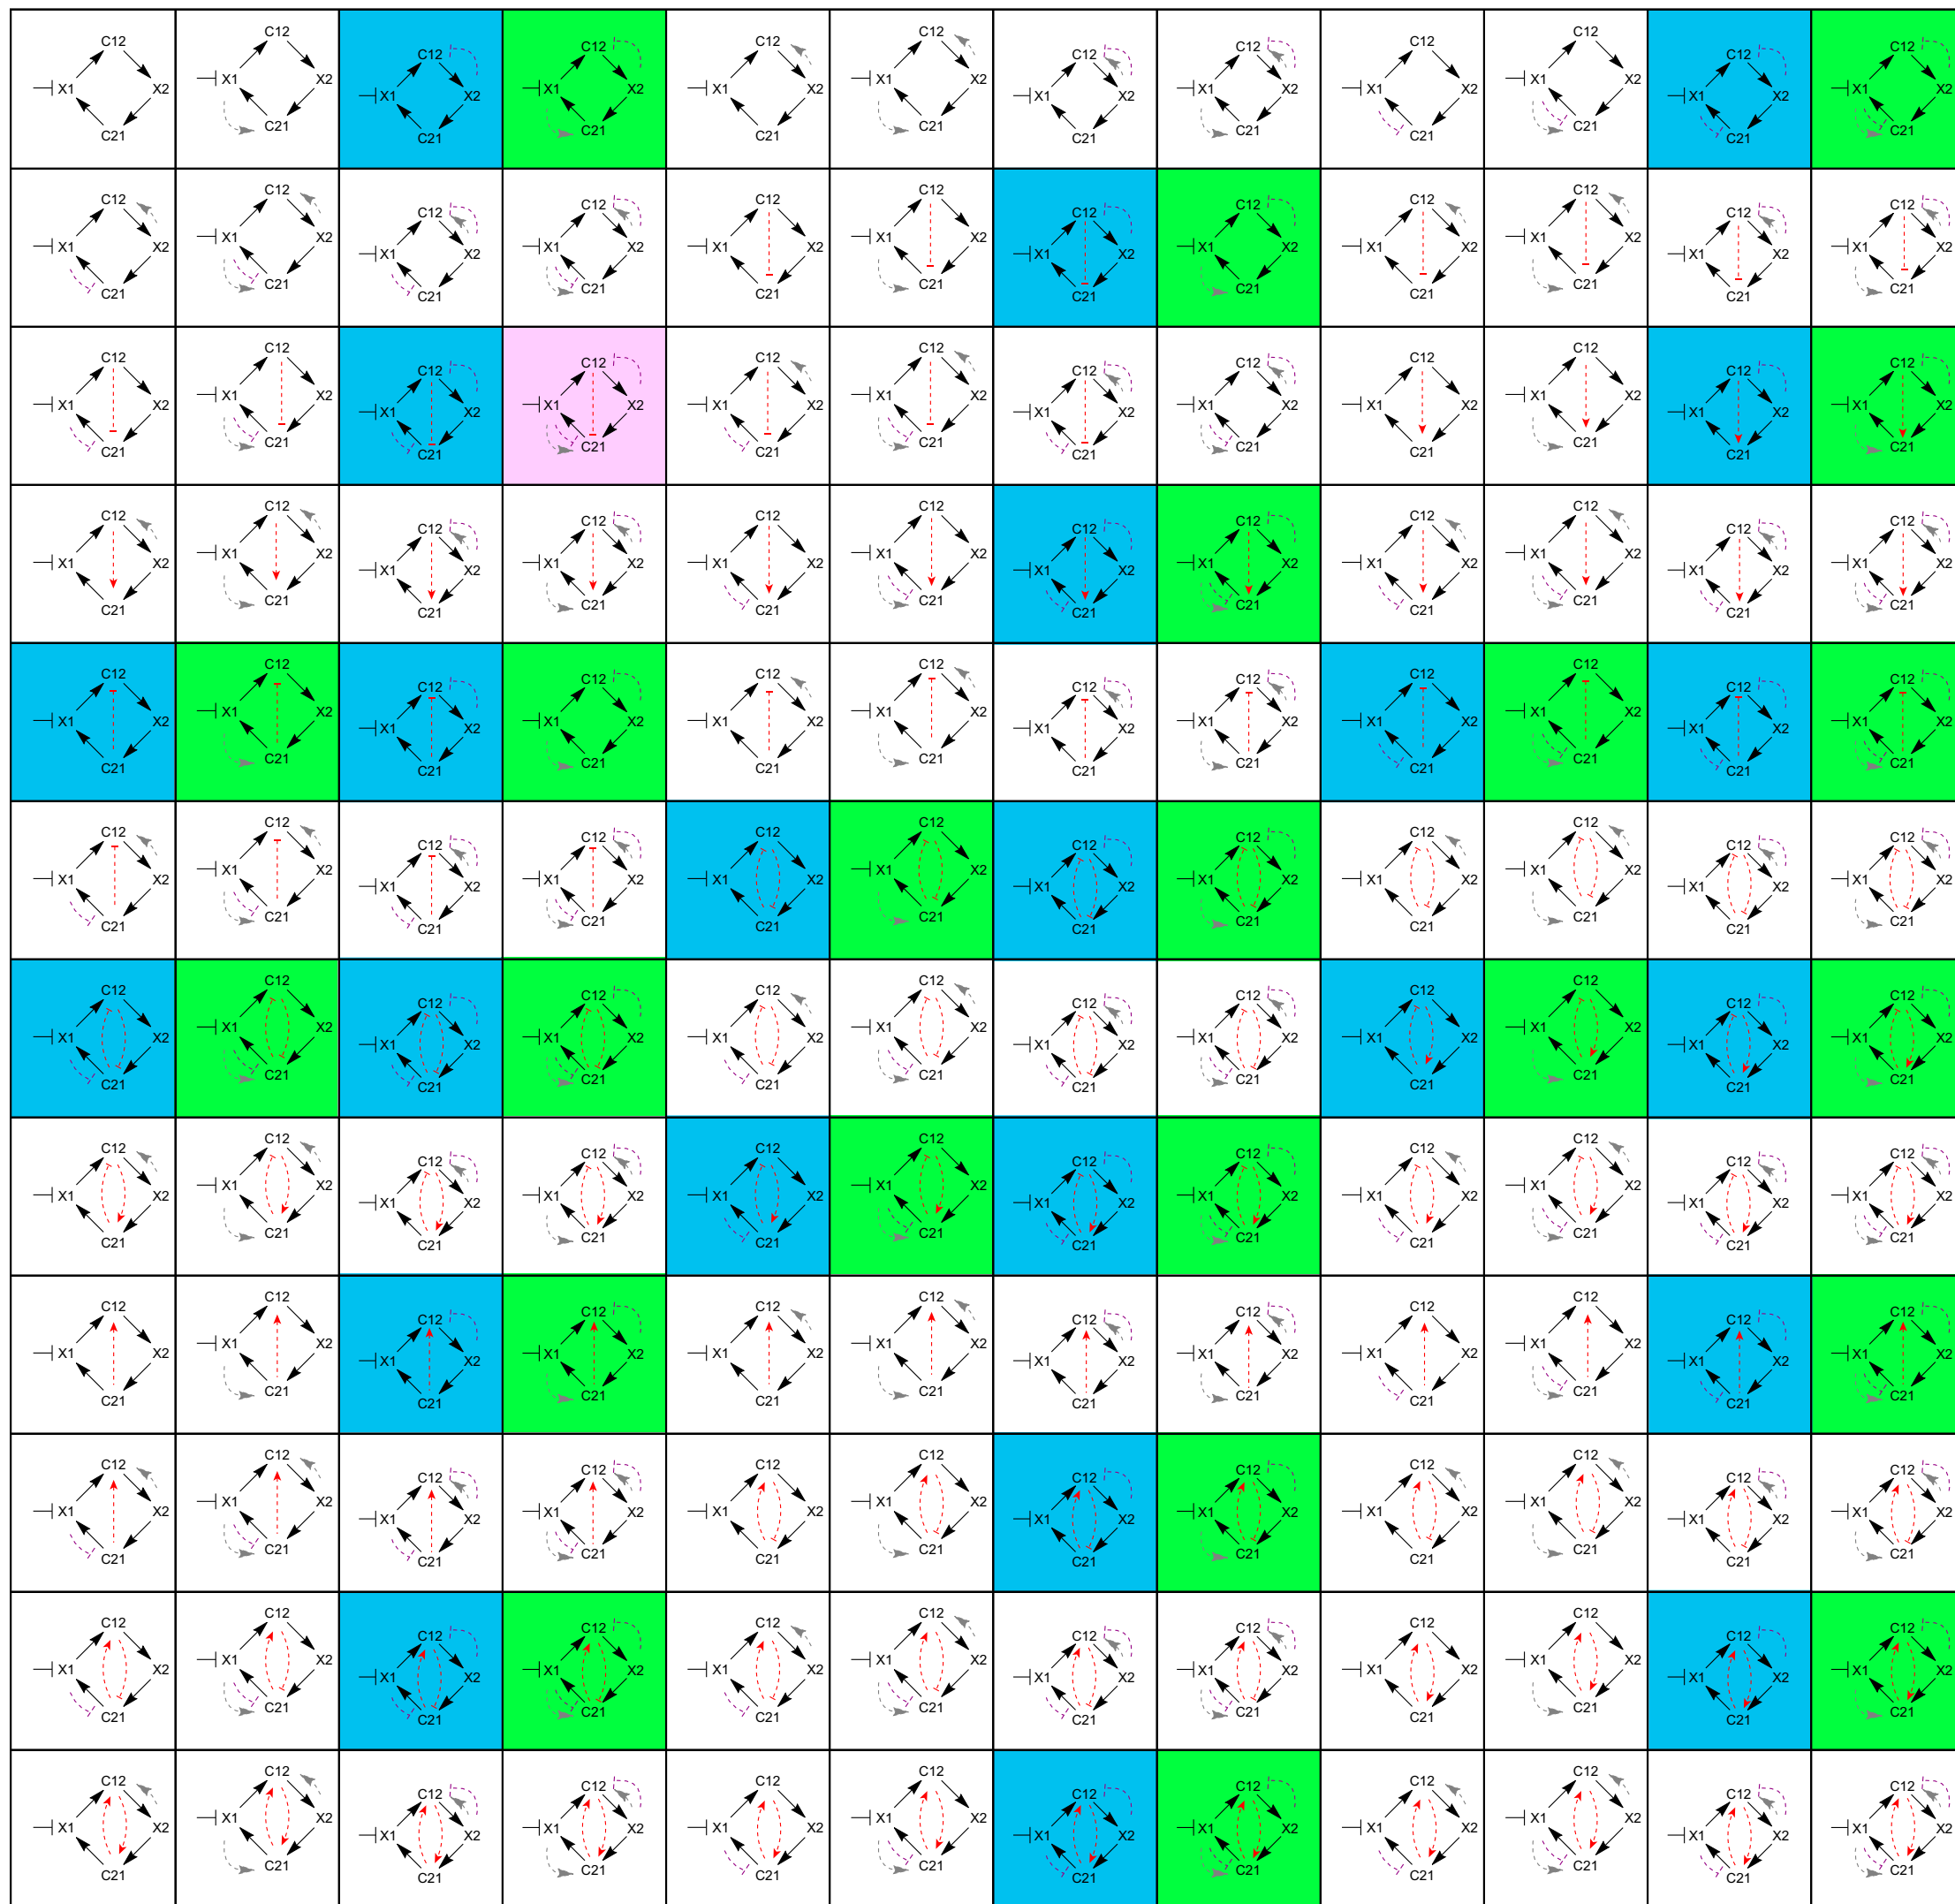

- - - - - endocytosis
- - - - - autocrine
- - - - - up-regulation
- - - - - down-regulation
- stable circuit with ON and OFF states
- stable circuit with ON, ON-OFF and OFF states
- The FB-MP observed circuit

Fig. S2. All 144 possible two-cell circuits in the two-cell circuit screen with the 48 stable circuits marked. The 24 circuits that show also the ON-OFF state are marked in green, and the observed FB-MP circuit marked in light purple.

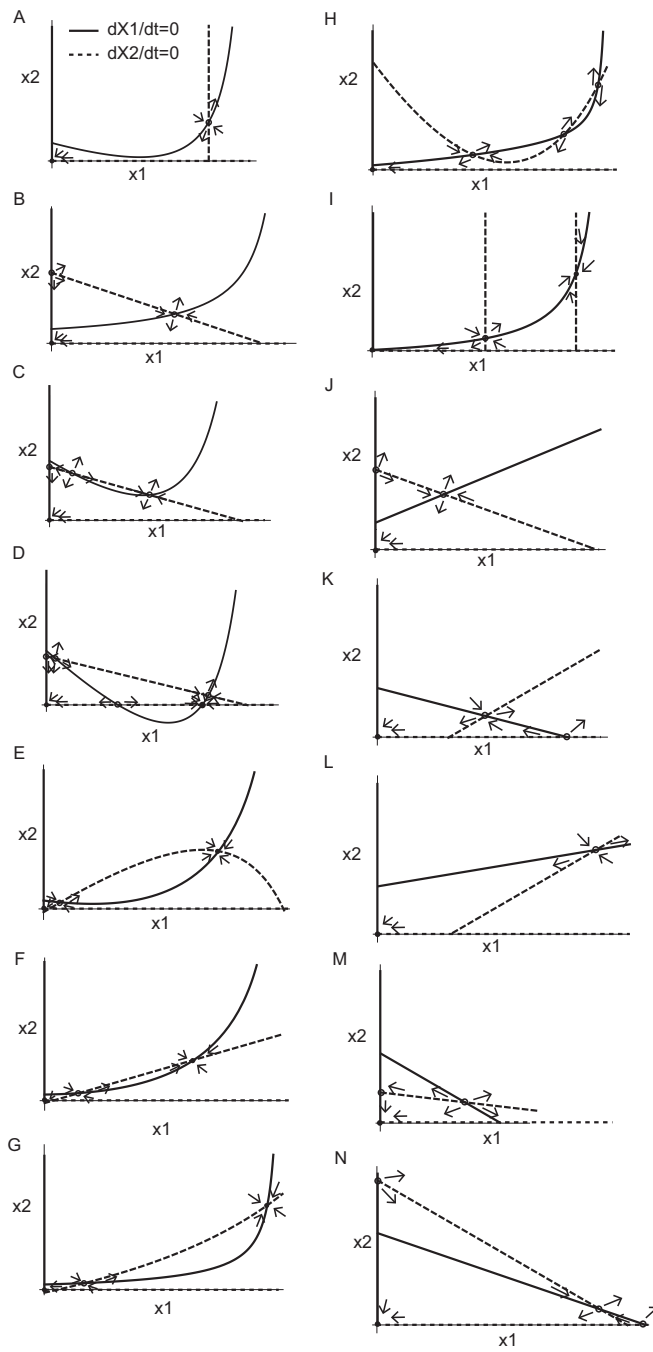

Fig. S3. (A–N) Phase portraits showing the nullclines of the two-cell circuits for different interactions and conditions on the parameters.

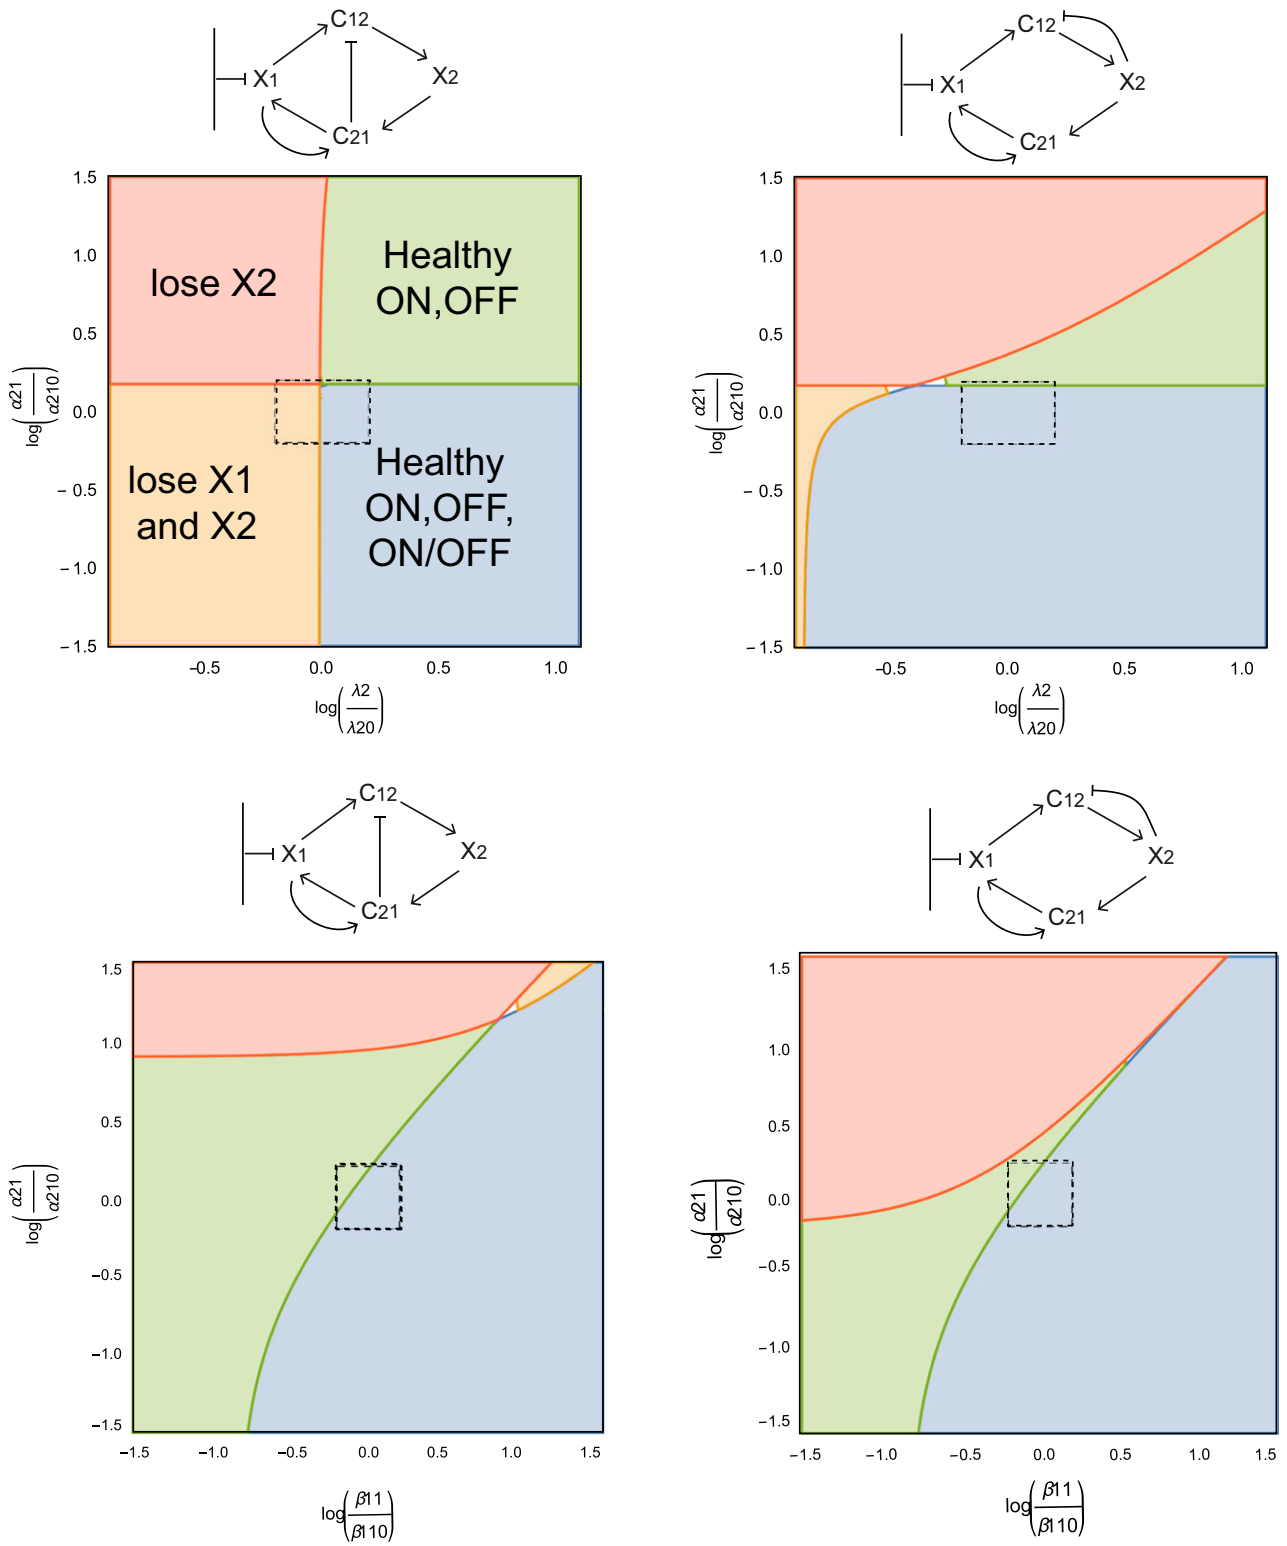

**Fig. S4.** Two more combinations of parameters from the model showing how many fixed points the two-cell circuits have in these parameter ranges.



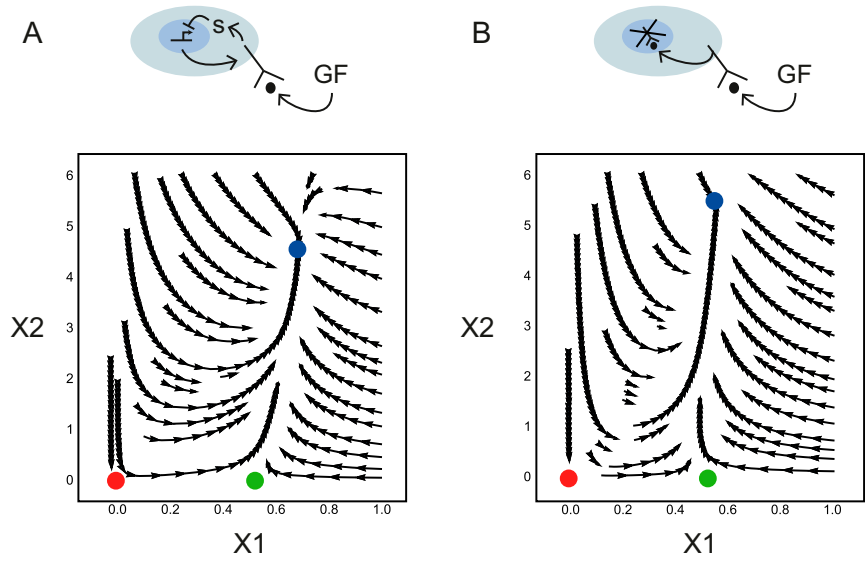

**Fig. 55.** (A) Simulations of the observed FB–MP circuit with a negative feedback on the GF receptor levels with the same dimensionless parameters as in Fig. 1E. (B) Phase portrait of the observed FB–MP circuit with receptor internalization through endocytosis with the same dimensionless parameters as in Fig. 1E only with  $\bar{\lambda}_1 = 5, \bar{\lambda}_2 = 4$  and  $\alpha_1 = \alpha_2 = 1$ .

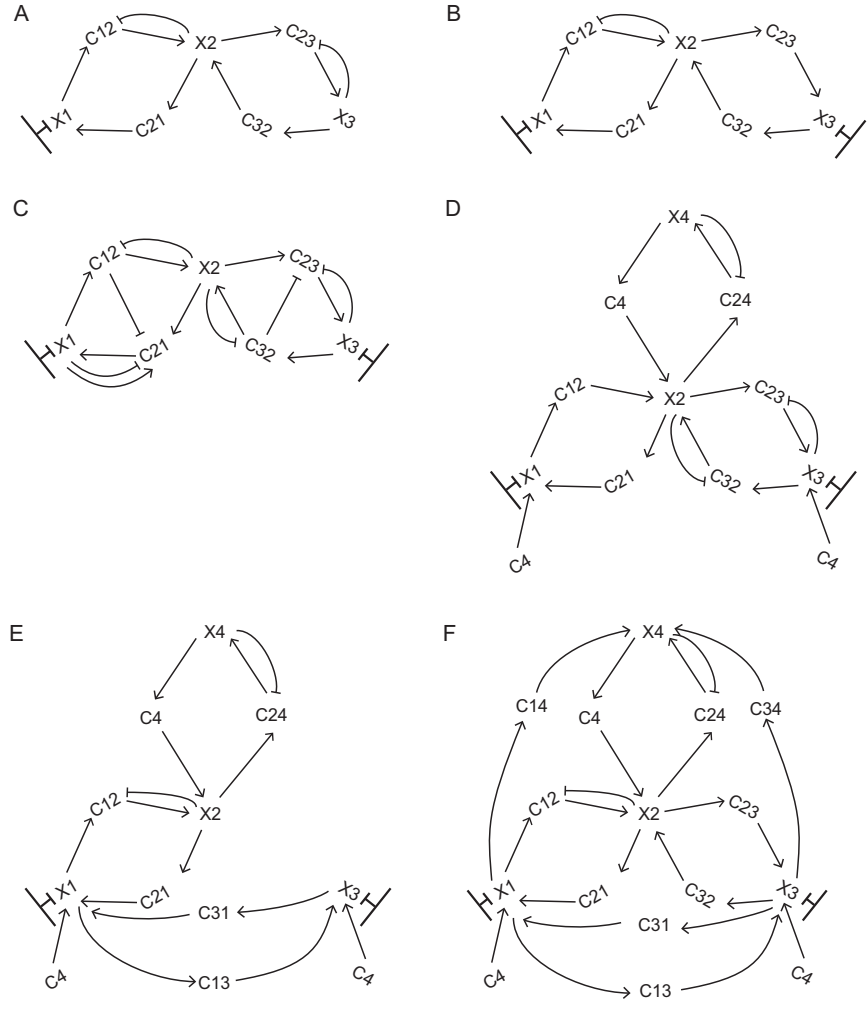

**Fig. 56.** (A–C) Three additional three-cell circuits and (D–F) three additional four-cell circuits that implement our hypothesized generalized condition for stability show a stable ON state of all cell types.
